# Supplementary material for: Isolable rubidium and caesium derivatives of common organic carbonyl compounds
Source: Royal Society of Chemistry journal article supplement (doi:10.1039/d3cc05527b), 2023-11-22
Supplement: d3cc05527b1.pdf [file d3cc05527b1.pdf]

**Supporting Information to accompany**  
**Isolable Rubidium and Caesium Derivatives of Common Organic**  
**Carbonyl Compounds**

Jakoba Wacker,<sup>a,#</sup> Jennifer R. Lynch,<sup>a,#</sup> Sumanta Banerjee,<sup>a</sup> Peter A. Macdonald,<sup>a</sup>  
Alan R. Kennedy,<sup>a</sup> Biprajit Sarkar,<sup>b</sup> Robert E. Mulvey\*<sup>a</sup>

[r.e.mulvey@strath.ac.uk](mailto:r.e.mulvey@strath.ac.uk)

<sup>a</sup> Department of Pure and Applied Chemistry, University of Strathclyde, Glasgow,  
G1 1XL, UK

<sup>b</sup> Institut für Anorganische Chemie, Universität Stuttgart Pfaffenwaldring 55,  
70569 Stuttgart, Germany

# J.W. and J.R.L. contributed equally to this work.

## Contents

|                                                                                                                                                              |    |
|--------------------------------------------------------------------------------------------------------------------------------------------------------------|----|
| General Experimental .....                                                                                                                                   | 3  |
| X-ray crystallography .....                                                                                                                                  | 4  |
| Figure S1: Reported X-ray crystallographically-characterised structures of [CsN(SiMe <sub>3</sub> ) <sub>2</sub> ] .....                                     | 5  |
| Synthesis of [CsOC(CH <sub>2</sub> )C <sub>6</sub> H <sub>5</sub> ] <sub>n</sub> ( <b>1-Cs</b> ) .....                                                       | 6  |
| Figure S2: ORTEP diagram of [CsOC(CH <sub>2</sub> )C <sub>6</sub> H <sub>5</sub> ] <sub>n</sub> ( <b>1-Cs</b> ) .....                                        | 9  |
| Table S1: Selected bond lengths (Å) and bond angles (°) .....                                                                                                | 9  |
| Hydrolysis of [CsOC(CH <sub>2</sub> )C <sub>6</sub> H <sub>5</sub> ] <sub>n</sub> ( <b>1-Cs</b> ) .....                                                      | 10 |
| Synthesis of [RbOC(C <sub>6</sub> H <sub>5</sub> )CHC(CH <sub>2</sub> )C <sub>6</sub> H <sub>5</sub> .THF] <sub>n</sub> ( <b>2-Rb</b> ) .....                | 11 |
| Scheme S1: Proposed Mechanism for the formation of <b>2</b> .....                                                                                            | 12 |
| Figure S3: ORTEP diagram of [RbOC(C <sub>6</sub> H <sub>5</sub> )CHC(CH <sub>2</sub> )C <sub>6</sub> H <sub>5</sub> .THF] <sub>n</sub> ( <b>2-Rb</b> ) ..... | 13 |
| Table S2: Selected bond lengths (Å) and bond angles (°) .....                                                                                                | 13 |
| Hydrolysis of [RbOC(C <sub>6</sub> H <sub>5</sub> )CHC(CH <sub>2</sub> )C <sub>6</sub> H <sub>5</sub> .THF] <sub>n</sub> ( <b>2-Rb</b> ) .....               | 15 |
| Synthesis of [CsOC(C <sub>6</sub> H <sub>5</sub> )CHC(CH <sub>2</sub> )C <sub>6</sub> H <sub>5</sub> .THF] <sub>n</sub> ( <b>2-Cs</b> ) .....                | 16 |
| Figure S4: ORTEP diagram of [CsOC(C <sub>6</sub> H <sub>5</sub> )CHC(CH <sub>2</sub> )C <sub>6</sub> H <sub>5</sub> .THF] <sub>n</sub> ( <b>2-Cs</b> ) ..... | 18 |
| Table S3: Selected bond lengths (Å) and bond angles (°) .....                                                                                                | 18 |
| Hydrolysis of [CsOC(C <sub>6</sub> H <sub>5</sub> )CHC(CH <sub>2</sub> )C <sub>6</sub> H <sub>5</sub> .THF] <sub>n</sub> ( <b>2-Cs</b> ) .....               | 20 |
| Synthesis of [RbOC(C <sub>6</sub> H <sub>5</sub> )NCH <sub>2</sub> C <sub>6</sub> H <sub>5</sub> ] <sub>n</sub> ( <b>3-Rb</b> ) .....                        | 21 |
| Figure S5: ORTEP diagram of [RbOC(C <sub>6</sub> H <sub>5</sub> )NCH <sub>2</sub> C <sub>6</sub> H <sub>5</sub> ] <sub>n</sub> ( <b>3-Rb</b> ) .....         | 23 |
| Table S4: Selected bond lengths (Å) and bond angles (°) .....                                                                                                | 23 |
| Hydrolysis of [RbOC(C <sub>6</sub> H <sub>5</sub> )NCH <sub>2</sub> C <sub>6</sub> H <sub>5</sub> ] <sub>n</sub> ( <b>3-Rb</b> ) .....                       | 25 |
| Synthesis of [CsOC(C <sub>6</sub> H <sub>5</sub> )NCH <sub>2</sub> C <sub>6</sub> H <sub>5</sub> ] <sub>n</sub> ( <b>3-Cs</b> ) .....                        | 26 |
| Figure S6: ORTEP diagram of [CsOC(C <sub>6</sub> H <sub>5</sub> )NCH <sub>2</sub> C <sub>6</sub> H <sub>5</sub> ] <sub>n</sub> ( <b>3-Cs</b> ) .....         | 29 |
| Table S5: Selected bond lengths (Å) and bond angles (°) .....                                                                                                | 29 |
| Hydrolysis of [CsOC(C <sub>6</sub> H <sub>5</sub> )NCH <sub>2</sub> C <sub>6</sub> H <sub>5</sub> ] <sub>n</sub> ( <b>3-Cs</b> ) .....                       | 31 |
| Table S6: Selected X-ray crystal structural data and refinement details for compounds <b>1-3</b> .....                                                       | 32 |
| References .....                                                                                                                                             | 33 |

## General Experimental

All reactions were performed under a protective argon or nitrogen atmosphere using either standard Schlenk or glove box techniques. Benzene and THF were dried by heating to reflux over sodium benzophenone ketyl and then distilled under nitrogen prior to use. C<sub>6</sub>D<sub>6</sub> and THF-d<sub>8</sub> were stored over activated 4 Å molecular sieves.<sup>1</sup>

RbHMDS and CsHMDS were synthesised using commercially available reagents via literature preparations.<sup>2,3</sup> <sup>n</sup>BuLi (1.6 M in hexane) was purchased commercially from Sigma-Aldrich and used as received. Acetophenone and benzaldehyde reagents were purchased from Sigma-Aldrich and stored over activated 4 Å molecular sieves prior to use. All other reagents were purchased from commercial sources and were used as received.

NMR spectra were recorded on a Bruker AV400 MHz spectrometer operating 400.13 MHz for <sup>1</sup>H, 100.62 MHz for <sup>13</sup>C and a Bruker AV500 MHz spectrometer operating at 65.6 MHz for <sup>133</sup>Cs. All <sup>13</sup>C NMR spectra were proton decoupled. <sup>1</sup>H, <sup>13</sup>C{<sup>1</sup>H} and <sup>133</sup>Cs chemical shifts are expressed in parts per million (δ, ppm) and where appropriate referenced to residual solvent peaks or external references.

GC-MS was performed using an Agilent Technologies 7890A gas chromatography system with a 5975C inert XL EI/CI MSD with triple-axis detector. A Restek 30 m x 0.25 mm ID x 0.25 μm column was used with helium as the mobile phase.

## X-ray crystallography

Data for were measured with a Rigaku Synergy-i instrument using monochromated ( $\lambda = 1.54184 \text{ \AA}$ ) radiation. In all cases, data collection and processing used CrysAlisPro software.<sup>4</sup> The structures were refined to convergence against  $F^2$  using all independent reflections and SHELXL<sup>5</sup> as implemented within WinGX<sup>6</sup> or OLEX.<sup>7</sup> In all structures the non-hydrogen atoms were refined anisotropically and hydrogen atoms were placed in idealised positions and refined in riding modes. THF and phenyl groups of  $\text{C}_{20.76}\text{H}_{22.51}\text{CsO}_{2.19}$  and THF groups of  $\text{C}_{57}\text{H}_{57}\text{Rb}_3\text{O}_{5.25}$  were modelled as disordered. In each case appropriate constraints and restraints were applied to bond lengths and to displacement parameters so as to ensure that these approximate normal behaviour. In the case of  $\text{C}_{57}\text{H}_{57}\text{Rb}_3\text{O}_{5.25}$  after many trial calculations, a partially present and disordered THF group has been placed in a somewhat unusual position between two Rb centres. This is the best solution found that reflects both the observed electron density distribution and our knowledge of the materials used in the synthesis of this compound. Selected crystallographic data and refinement parameters are presented in Table **S6**. Deposition numbers 2293054 to 2293058 contain the full supplementary crystallographic data for this paper in cif format. These data are provided free of charge by the joint Cambridge Crystallographic Data Centre and Fachinformationszentrum Karlsruhe Access Structures service [www.ccdc.cam.ac.uk/structures](http://www.ccdc.cam.ac.uk/structures).

Figure S1: Reported X-ray crystallographically-characterised structures of  $[\text{CsN}(\text{SiMe}_3)_2]^{[10]}$

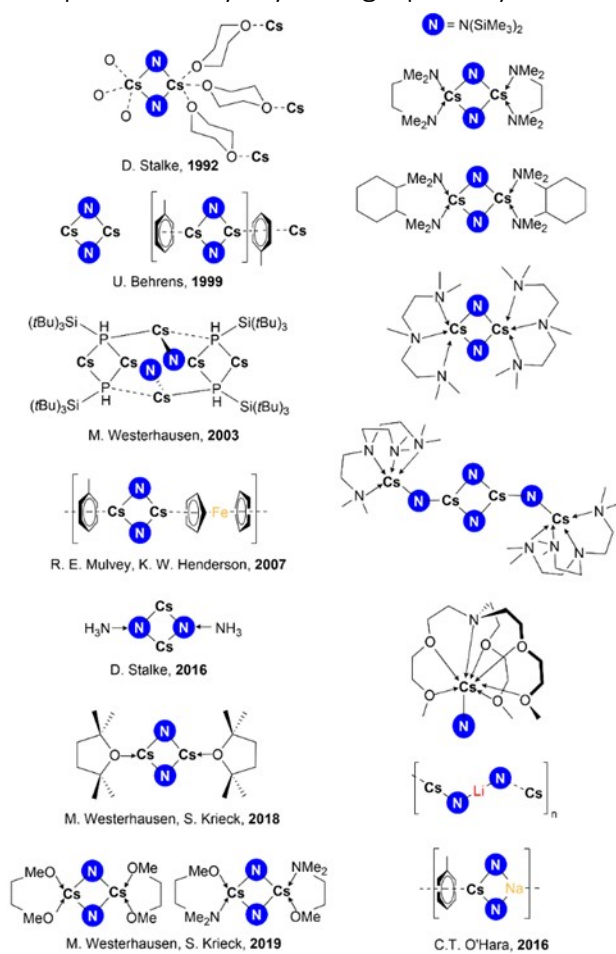

## Synthesis of $[\text{CsOC}(\text{CH}_2)\text{C}_6\text{H}_5]_n$ (**1-Cs**)

CsHMDS (0.0735 g, 0.25 mmol) was dissolved in benzene (10 ml) before acetophenone (29  $\mu\text{l}$ , 0.25 mmol) was added to give an off-white suspension, and the reaction was stirred overnight. A small crop of colourless crystals of compound **1-Cs** was obtained from a yellow solution of THF layered with hexane in a  $-20\text{ }^\circ\text{C}$  freezer (0.0212 g, 0.084 mmol, 33.6 %). Additional dark yellow solid was obtained by drying and removal of residual solvent in vacuo (0.0232 g, 0.092 mmol, 37 %).

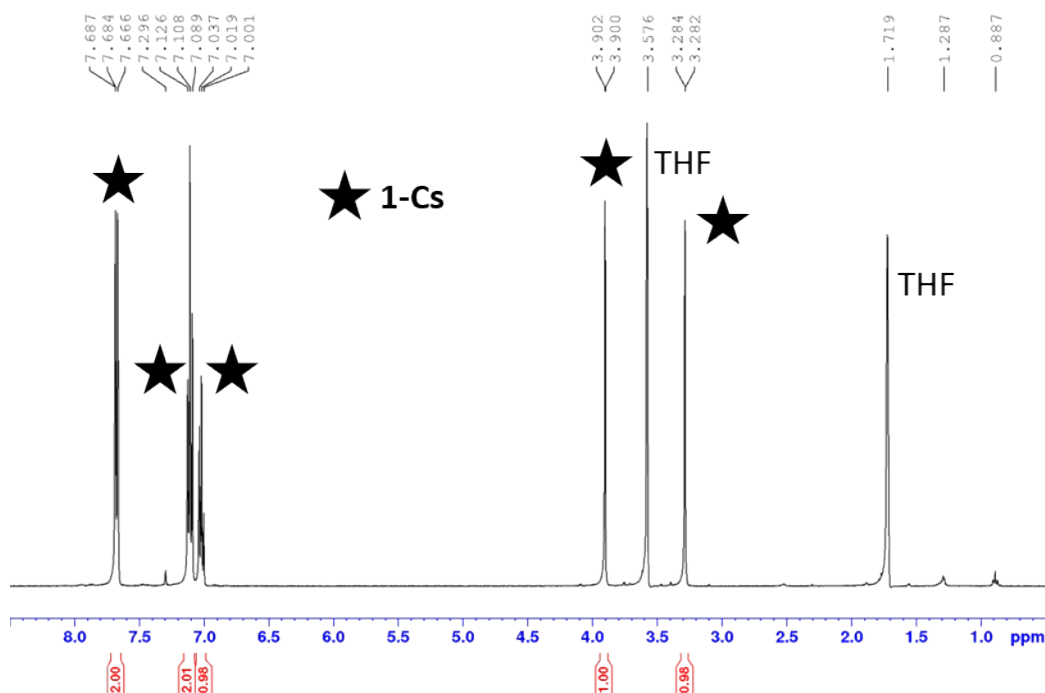

**$^1\text{H}$  NMR (400.1 MHz, THF- $d_8$ , 300 K):**  $\delta$  7.68 (m, 2H, CH, Ph), 7.30 (residual  $\text{C}_6\text{D}_6$ ), 7.11 (m, 2H, CH, Ph), 7.02 (tm, 1H, CH, Ph), 3.90 (m, 1H,  $\text{CH}_2$ ,  $-\text{CH}_2$ ), 3.58 (THF- $d_8$ ), 3.28 (m, 1H,  $\text{CH}_2$ ,  $-\text{CH}_2$ ), 1.72 (THF- $d_8$ ), 1.29 (residual hexane), 0.89 (residual hexane) ppm.

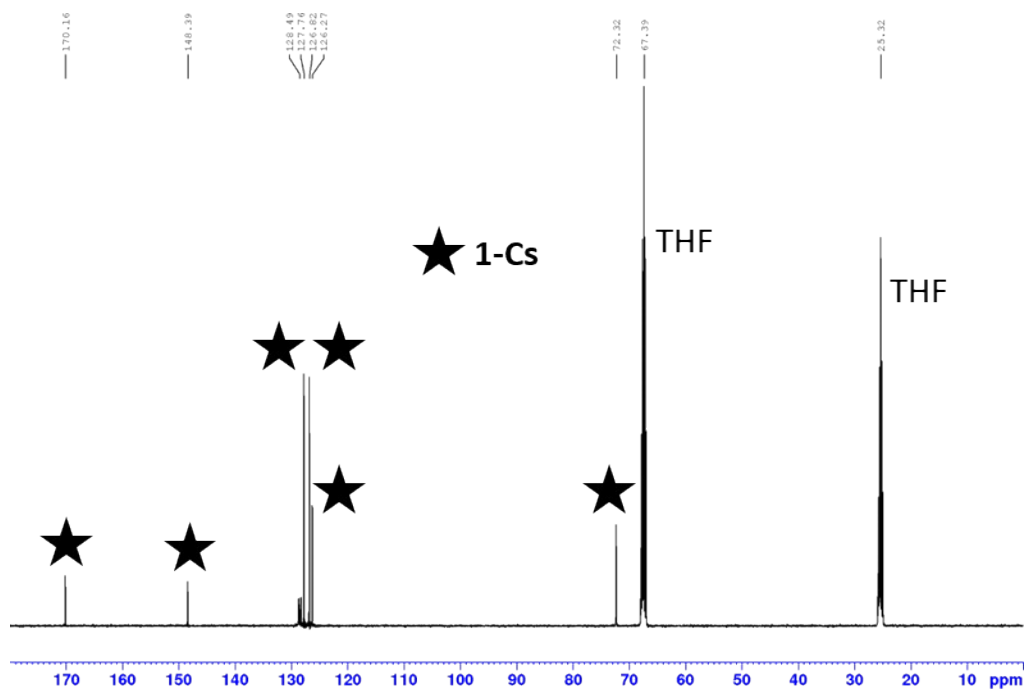

$^{13}\text{C}\{^1\text{H}\}$  NMR (100.6 MHz, THF- $d_8$ , 300 K):  $\delta$  170.2 ( $\text{C}_{\text{quaternary}}$ ,  $-\text{C}=\text{O}$ ), 148.4 ( $\text{C}_{\text{quaternary}}$ , Ph), 128.5 (residual  $\text{C}_6\text{D}_6$ ), 127.8 ( $\text{CH}_2$ , Ph), 126.8 ( $\text{CH}_2$ , Ph), 126.3 ( $\text{CH}$ , Ph), 72.3 ( $\text{CH}_2$ ), 67.4 (THF- $d_8$ ), 25.3 (THF- $d_8$ ) ppm.

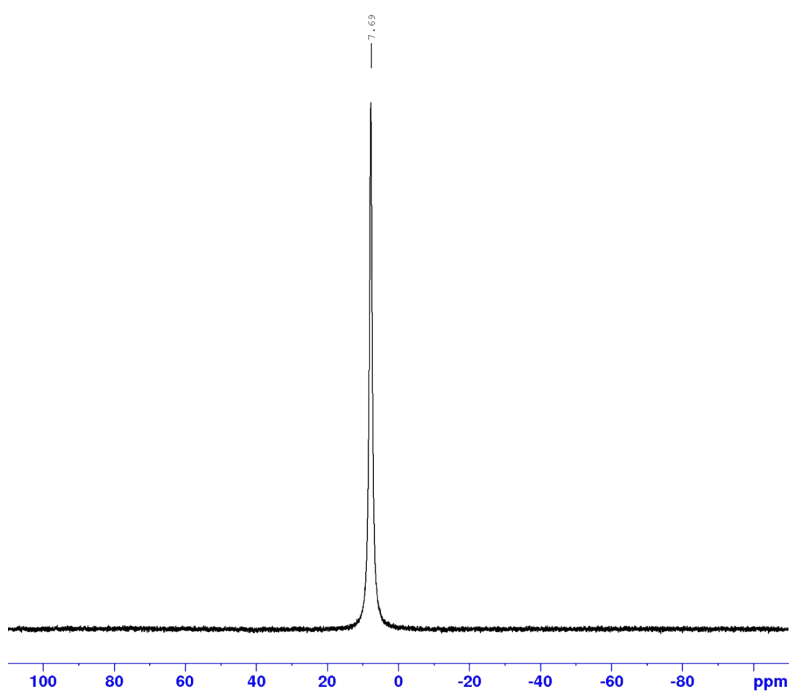

$^{133}\text{Cs}$  NMR (65.6 MHz, THF- $D_8$ , 300 K):  $\delta$  7.69 (1-Cs) ppm.

Note that if the reaction of acetophenone and CsHMDS in THF is monitored over the course of heating, conversion of 1-Cs to 2-Cs may be observed in the  $^1\text{H}$  NMR spectrum, alongside consumption of acetophenone. This reaction was carried out in a J Youngs NMR tube at 0.05 mmol scale and as such a degree of error in addition of reagents is likely, despite care being taken to maintain a 1:1 stoichiometry.

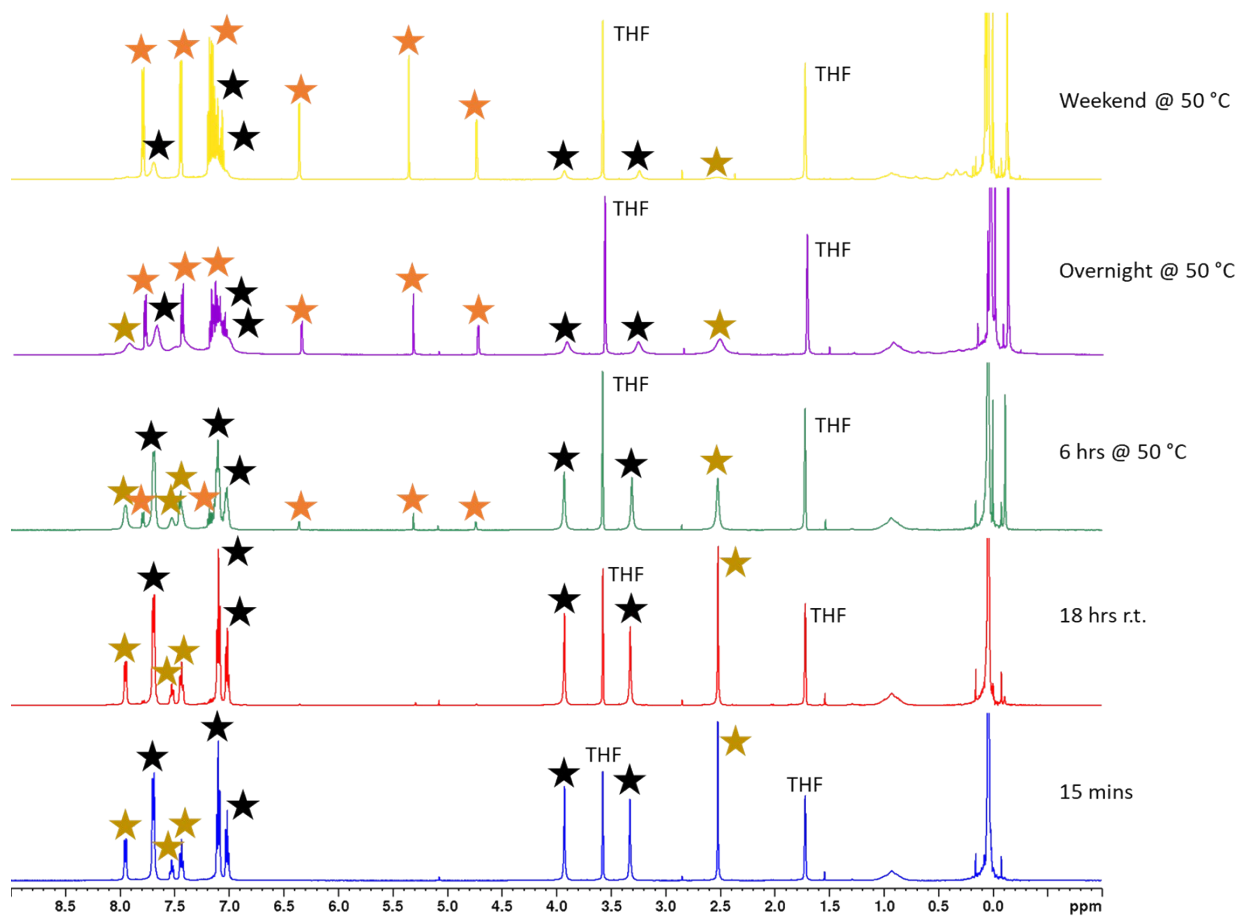

★ 1-Cs ★ 2-Cs ★ Acetophenone



Figure S2: ORTEP diagram of  $[\text{CsOC}(\text{CH}_2)\text{C}_6\text{H}_5]_n$  (**1-Cs**)

Structure of **1-Cs**, thermal ellipsoids are displayed at 20 % probability level.

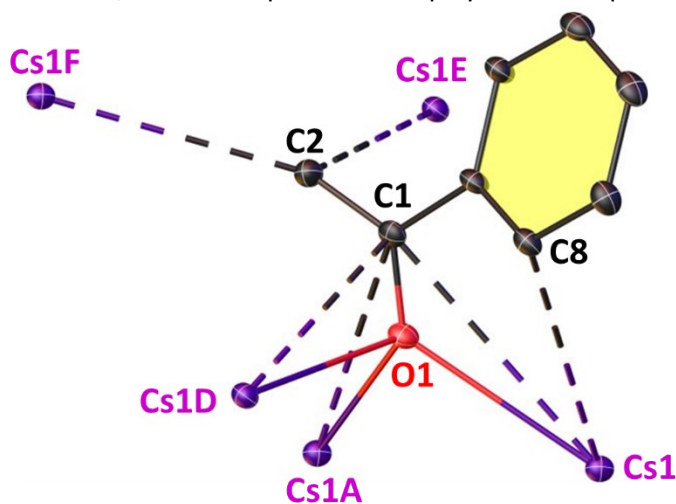

Table S1: Selected bond lengths (Å) and bond angles (°)

| <b>Bonds</b> | <b>Bond Lengths (Å)</b> |
|--------------|-------------------------|
| Cs1 C2       | 3.458(8)                |
| Cs1 O1       | 2.958(4)                |
| Cs1 C1       | 3.288(6)                |
| Cs1 C2       | 3.724(7)                |
| Cs1 C8       | 3.599(7)                |
| Cs1 O1       | 2.932(6)                |
| Cs1 O1       | 2.963(4)                |
| Cs1 C2       | 3.385(7)                |
| C1 C2        | 1.38(1)                 |
| O1 C1        | 1.291(8)                |
| C1 C3        | 1.503(9)                |
| Cs1 O1       | 2.932(6)                |
| <b>Bonds</b> | <b>Bond Angles (°)</b>  |
| C3 C1 O1     | 117.1(6)                |
| C3 C1 C2     | 119.7(6)                |
| C2 C1 O1     | 123.2(6)                |
| O1 Cs1 C2    | 74.7(2)                 |
| C2 Cs1 C8    | 79.2(2)                 |
| C8 Cs1 O1    | 49.9(1)                 |
| O1 Cs1 C2    | 161.2(2)                |
| O1 Cs1 O1    | 114.7(1)                |
| O1 Cs1 C1    | 97.3(1)                 |
| O1 Cs1 C2    | 76.8(2)                 |
| C8 Cs1 C2    | 120.2(2)                |

|            |          |
|------------|----------|
| C8 Cs1 O1  | 98.5(1)  |
| C8 Cs1 C1  | 75.5(2)  |
| C8 Cs1 C2  | 66.7(2)  |
| C8 Cs1 O1  | 138.6(1) |
| Cs1 C2 C1  | 146.7(5) |
| Cs1 C2 C1  | 95.7(5)  |
| Cs1 C2 Cs1 | 117.0(2) |
| Cs1 C2 Cs1 | 86.8(2)  |
| Cs1 O1 C1  | 93.0(4)  |
| Cs1 C1 C2  | 97.4(5)  |
| Cs1 O1 Cs1 | 101.4(1) |
| Cs1 O1 C1  | 125.6(4) |
| O1 Cs1 O1  | 88.9(1)  |
| Cs1 O1 Cs1 | 91.1(1)  |

#### Hydrolysis of $[\text{CsOC}(\text{CH}_2)\text{C}_6\text{H}_5]_n$ (**1-Cs**)

After completion, the reaction mixture of 1-Cs was hydrolysed using a six-fold excess  $\text{H}_2\text{O}$  before being filtered, the resulting solution was dried in vacuo and used to perform NMR and Mass Spectroscopic studies. NMR of the final hydrolysed products was performed in  $\text{CDCl}_3$  with adamantane as a standard, while GC-MS was carried out in MeOH. The NIST database was used to identify compounds of interest from the mass spectra.

**$^1\text{H}$  NMR (400.1 MHz,  $\text{CDCl}_3$ , 300 K):**  $\delta$  7.96 (m, 2H, CH, acetophenone), 7.57 (m, 1H, CH, acetophenone), 7.47 (m, 2H, CH, acetophenone), 7.26 ( $\text{CDCl}_3$ ), 2.61 (s, 3H,  $\text{CH}_3$ , acetophenone), 1.88 (adamantane), 1.79 (adamantane), 1.26 (residual hexane), 0.86 (residual hexane), 0.06 (residual HMDS) ppm.

**$^{13}\text{C}\{^1\text{H}\}$  NMR (100.6 MHz,  $\text{CDCl}_3$ , 300 K):**  $\delta$  198.3 (C=O, acetophenone), 137.3 ( $\text{C}_{\text{quaternary}}$ , acetophenone), 133.2 (CH, acetophenone), 128.7 (CH, acetophenone), 128.5 (CH, acetophenone), 77.2 ( $\text{CDCl}_3$ ), 37.9 (adamantane), 37.2 (unknown), 32.9 (unknown), 32.1 (residual hexane), 30.2 (unknown), 29.9 (unknown), 29.5 (unknown), 28.5 (adamantane), 27.2 (unknown), 26.7 ( $\text{CH}_3$ , acetophenone), 22.8 (residual hexane), 19.9 (unknown), 14.3 (residual hexane) ppm.

**GC-MS (MeOH):** Acetophenone (rt 7.5 mins, m/z 105).

## Synthesis of $[\text{RbOC}(\text{C}_6\text{H}_5)\text{CHC}(\text{CH}_2)\text{C}_6\text{H}_5 \cdot \text{THF}]_n$ (**2-Rb**)

RbHMDS (0.0615 g, 0.25 mmol) dissolved in THF (1 ml) before acetophenone (58  $\mu\text{l}$ , 0.5 mmol) was added to give a white suspension which gradually turned to a dark yellow solution when heated overnight at 70  $^\circ\text{C}$ . A small crop of colourless crystals of compound **2-Rb** was obtained from a solution of THF layered with hexane in a -20  $^\circ\text{C}$  freezer (0.0363 g, 0.101 mmol, 40 %). Additional dark yellow solid was obtained by drying and removal of residual solvent in vacuo (0.0148 g, 0.041 mmol, 17 %). Both isolated products gave essentially identical NMR spectra, though a trace amount of **1-Rb** was evident in the dark yellow solid sample.

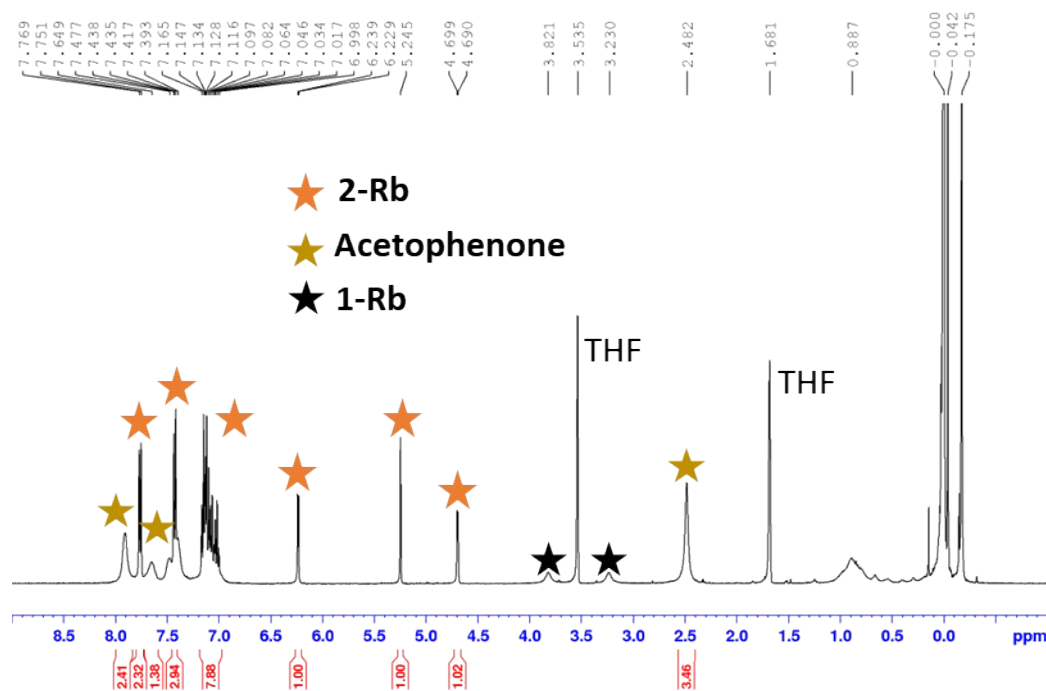

$^1\text{H}$  NMR (400.1 MHz,  $\text{THF-d}_8$ , 300 K):  $\delta$  7.91 (broad s, 2H, CH, acetophenone), 7.76 (m, 2H, CH, Ph), 7.65 (broad s, 2H, CH, acetophenone), 7.48-7.40 (broad s, CH, acetophenone), 7.43 (m, 3H, CH, Ph), 7.16-7.00 (broad m, 8H, CH, Ph), 6.23 (d, 1H,  $\text{CH}_2$ ,  $-\text{CH}_2$ ), 5.25 (s, 1H, CH,  $-\text{CH}$ ), 4.69 (d, 1H,  $\text{CH}_2$ ,  $-\text{CH}_2$ ), 3.82 (residual 1-Rb intermediate), 3.53 ( $\text{THF-d}_8$ ), 3.23 (residual 1-Rb intermediate), 2.48 (broad s, 4H,  $\text{CH}_3$ , acetophenone), 1.68 ( $\text{THF-d}_8$ ), 0.89 (residual hexane), 0.04 (unknown), 0.00 (HMDS(H)), -0.18 (residual RbHMDS) ppm.

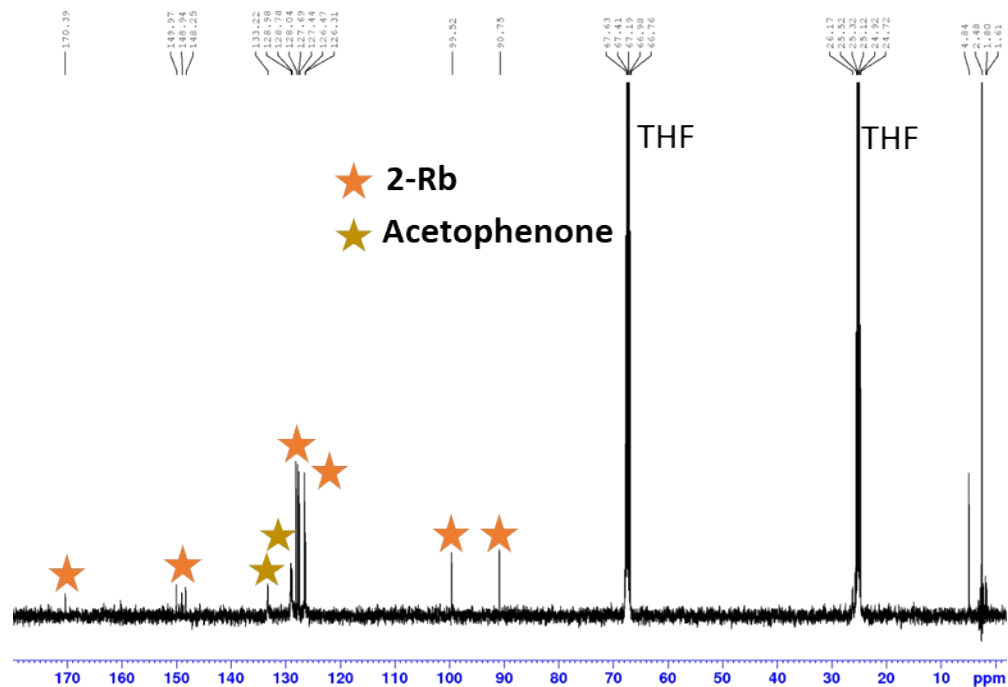

$^{13}\text{C}\{^1\text{H}\}$  NMR (100.6 MHz, THF- $d_8$ , 300 K):  $\delta$  170.4 ( $C_{\text{quaternary}}$ ,  $-\text{C}=\text{O}$ ), 150.0 ( $C_{\text{quaternary}}$ ,  $-\text{C}(\text{CH}_2)\text{Ph}$ ), 148.9 ( $C_{\text{quaternary}}$ , Ph), 148.3 ( $C_{\text{quaternary}}$ , Ph), 133.2 (CH, acetophenone) 129.0 (CH, acetophenone), 128.8 (CH, acetophenone), 128.0 (CH, Ph), 127.7 (CH, Ph), 127.4 (CH, Ph), 126.5 (CH, Ph), 126.3 (CH, Ph), 99.5 ( $\text{CH}_2$ ,  $-\text{CH}_2$ ), 90.8 (CH,  $-\text{CH}$ ), 67.2 (THF- $d_8$ ), 25.1 (THF- $d_8$ ), 4.8 (RbHMDS), 2.5 [HMDS(H)] ppm.

Scheme S1: Proposed Mechanism for the formation of 2

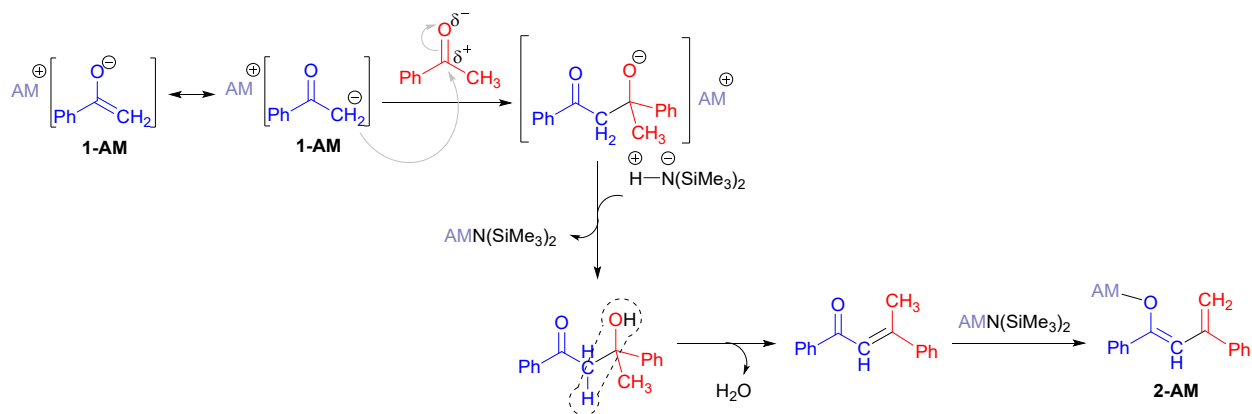

Figure S3: ORTEP diagram of  $[\text{RbOC}(\text{C}_6\text{H}_5)\text{CHC}(\text{CH}_2)\text{C}_6\text{H}_5\cdot\text{THF}]_n$  (**2-Rb**)

Structure of **2-Rb**, thermal ellipsoids are displayed at 20 % probability level.

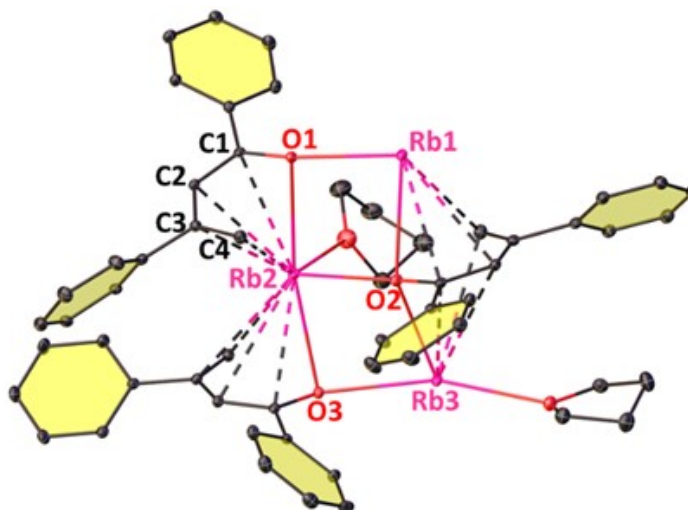

Table S2: Selected bond lengths (Å) and bond angles (°)

| Bonds   | Bond Lengths (Å) |
|---------|------------------|
| Rb2 O1  | 2.770(4)         |
| Rb2 O3  | 2.898(5)         |
| Rb2 C36 | 3.303(7)         |
| Rb2 C33 | 3.164(5)         |
| Rb2 C34 | 3.285(5)         |
| Rb2 C35 | 3.314(5)         |
| Rb2 O4  | 2.983(7)         |
| Rb2 C20 | 3.406(6)         |
| Rb2 C18 | 3.456(6)         |
| Rb2 C17 | 3.170(5)         |
| Rb2 C19 | 3.620(5)         |
| Rb2 O2  | 2.865(3)         |
| Rb3 O2  | 2.797(3)         |
| Rb3 O1  | 2.938(5)         |
| Rb1 O1  | 2.943(5)         |
| Rb1 O3  | 2.685(3)         |
| Rb3 O5  | 2.890(4)         |
| Rb3 C1  | 3.231(6)         |
| Rb1 O1  | 2.943(5)         |
| Rb1 C1  | 3.144(6)         |
| Rb1 C2  | 3.361(6)         |
| Rb1 C3  | 3.473(6)         |
| Rb1 C4  | 3.430(8)         |

|              |                        |
|--------------|------------------------|
| O3 C33       | 1.281(6)               |
| C33 C34      | 1.375(7)               |
| C34 C35      | 1.453(7)               |
| C35 C36      | 1.348(7)               |
| O2 C17       | 1.297(6)               |
| C17 C18      | 1.372(7)               |
| C18 C19      | 1.457(7)               |
| C19 C20      | 1.327(7)               |
| O1 C1        | 1.292(6)               |
| C1 C2        | 1.384(7)               |
| C2 C3        | 1.435(8)               |
| C3 C4        | 1.352(8)               |
| <b>Bonds</b> | <b>Bond Angles (°)</b> |
| Rb2 O4       | 92.5(2)                |
| Rb2 C33      | 23.9(1)                |
| Rb2 C34      | 44.1(1)                |
| Rb2 C35      | 56.6(1)                |
| Rb2 C36      | 56.3(1)                |
| Rb2 O1       | 83.8(1)                |
| Rb2 O2       | 165.9(1)               |
| Rb2 C17      | 154.4(1)               |
| Rb2 C18      | 144.2(1)               |
| Rb2 C19      | 139.0(1)               |
| Rb2 C20      | 138.6(1)               |
| O3 Rb2 O1    | 83.8(1)                |
| O1 Rb2 O2    | 82.5(1)                |
| O1 Rb2 O4    | 96.0(2)                |
| Rb2 O2 Rb3   | 93.9(1)                |
| O2 Rb3 O1    | 80.7(1)                |
| Rb3 O1 Rb2   | 92.9(1)                |
| Rb2 O3 Rb1   | 95.6(1)                |
| O3 Rb1 O1    | 84.5(1)                |
| Rb1 O1 Rb2   | 92.8(1)                |

## Hydrolysis of $[\text{RbOC}(\text{C}_6\text{H}_5)\text{CHC}(\text{CH}_2)\text{C}_6\text{H}_5\cdot\text{THF}]_n$ (2-Rb)

After completion, the reaction mixture of 2-Rb was hydrolysed using a six-fold excess  $\text{H}_2\text{O}$  before being filtered, the resulting solution was dried in vacuo and used to perform NMR and Mass Spectroscopic studies. NMR of final hydrolysed products was performed in  $\text{CDCl}_3$  with adamantane as a standard, while GC-MS was performed in MeOH. The NIST database was used to identify compounds of interest from the mass spectra.

**$^1\text{H}$  NMR (400.1 MHz,  $\text{CDCl}_3$ , 300 K):  $\delta$**  8.01 (m, 1H, CH, 1,3-diphenylbut-2-en-1-one), 7.98 (m, 2H, CH, acetophenone), 7.57 (m, 1H, CH, acetophenone), 7.47 (m, 2H, CH, acetophenone), 7.42 (m, 1H, CH, 1,3-diphenylbut-2-en-1-one), 7.26 ( $\text{CDCl}_3$ ), 7.17 (m, 1H, CH, 1,3-diphenylbut-2-en-1-one), 2.61 (s, 3H,  $\text{CH}_3$ , acetophenone), 2.60 (s, 1H,  $\text{CH}_3$ , 1,3-diphenylbut-2-en-1-one), 1.87 (adamantane), 1.75 (adamantane), 1.26 (residual hexane), 0.86 (residual hexane), 0.16 (residual HMDS) ppm. Data comparable with literature report of 1,3-diphenylbut-2-en-1-one.<sup>[8]</sup>

**$^{13}\text{C}\{^1\text{H}\}$  NMR (100.6 MHz,  $\text{CDCl}_3$ , 300 K):  $\delta$**  198.2 (C=O, acetophenone), 137.3 ( $\text{C}_{\text{quaternary}}$ , acetophenone), 133.2 (CH, acetophenone), 132.7 (CH, 1,3-diphenylbut-2-en-1-one), 129.3 (CH, 1,3-diphenylbut-2-en-1-one), 128.7 (CH, acetophenone), 128.5 (CH, acetophenone), 126.6 (CH, 1,3-diphenylbut-2-en-1-one), 122.3 (CH, 1,3-diphenylbut-2-en-1-one), 77.2 ( $\text{CDCl}_3$ ), 37.9 (adamantane), 37.2 (unknown), 30.2 (unknown), 29.8 ( $\text{CH}_3$ , 1,3-diphenylbut-2-en-1-one), 28.5 (adamantane), 27.2 (unknown), 26.7 ( $\text{CH}_3$ , acetophenone), 22.8 (residual hexane), 14.3 (residual hexane) ppm.

**GC-MS (MeOH):** Acetophenone (rt 7.5 mins, m/z 105), 1,3-diphenylbut-2-en-1-one (rt 12.8 and 13.6 mins, m/z 222).

## Synthesis of $[\text{CsOC}(\text{C}_6\text{H}_5)\text{CHC}(\text{CH}_2)\text{C}_6\text{H}_5\cdot\text{THF}]_n$ (**2-Cs**)

CsHMDS (0.0735 g, 0.25 mmol) dissolved in THF (1 ml) before acetophenone (58  $\mu\text{l}$ , 0.5 mmol) was added to give a pale-orange suspension which darkened upon heating overnight at 70 °C. Only a very small number of colourless crystals of **2-Cs**, suitable for X-ray crystallography authentication, was obtained from a solution of THF layered with hexane in a -20 °C freezer. An orange solid was obtained by drying and removal of residual solvent in vacuo (0.0707 g, 0.166 mmol, 66 %).

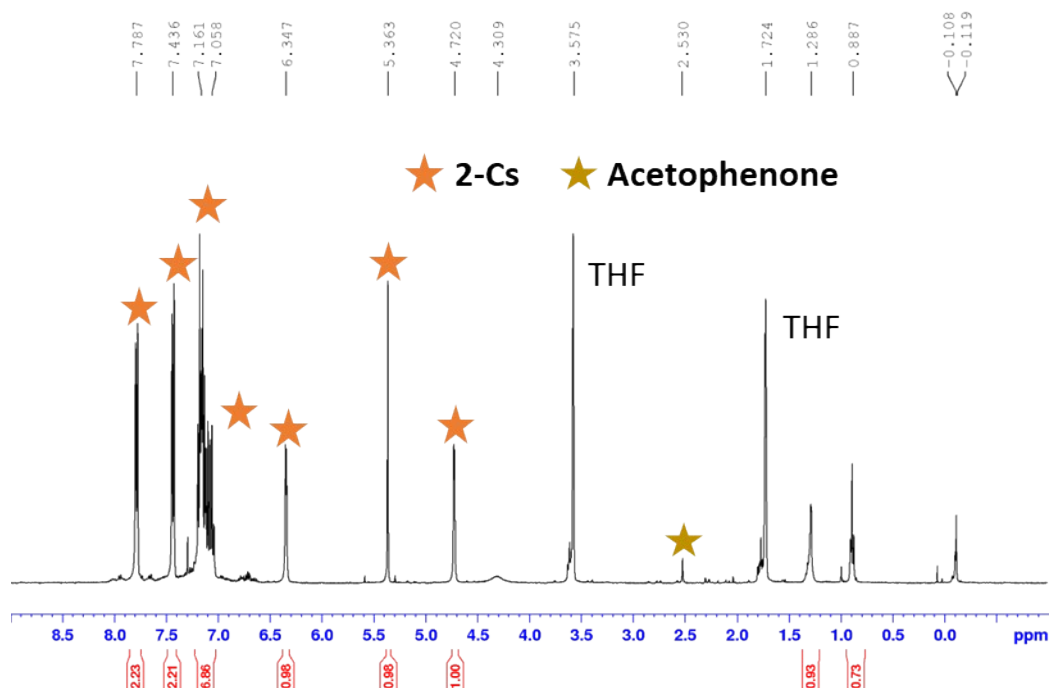

$^1\text{H NMR}$  (400.1 MHz,  $\text{THF-d}_8$ , 300 K):  $\delta$  7.79 (m, 2H, CH, Ph), 7.44 (m, 2H, CH, Ph), 7.16 (broad m, 5H, CH, Ph), 7.06 (broad m, 2H, CH, Ph), 6.35 (d, 1H,  $\text{CH}_2$ ,  $-\text{CH}_2$ ), 5.36 (s, 1H, CH,  $-\text{CH}$ ), 4.72 (d, 1H,  $\text{CH}_2$ ,  $-\text{CH}_2$ ), 4.31 (unknown), 3.58 ( $\text{THF-d}_8$ ), 2.53 (residual acetophenone), 1.72 ( $\text{THF-d}_8$ ), 1.29 (residual hexane), 0.89 (residual hexane), -0.12 (residual CsHMDS) ppm.



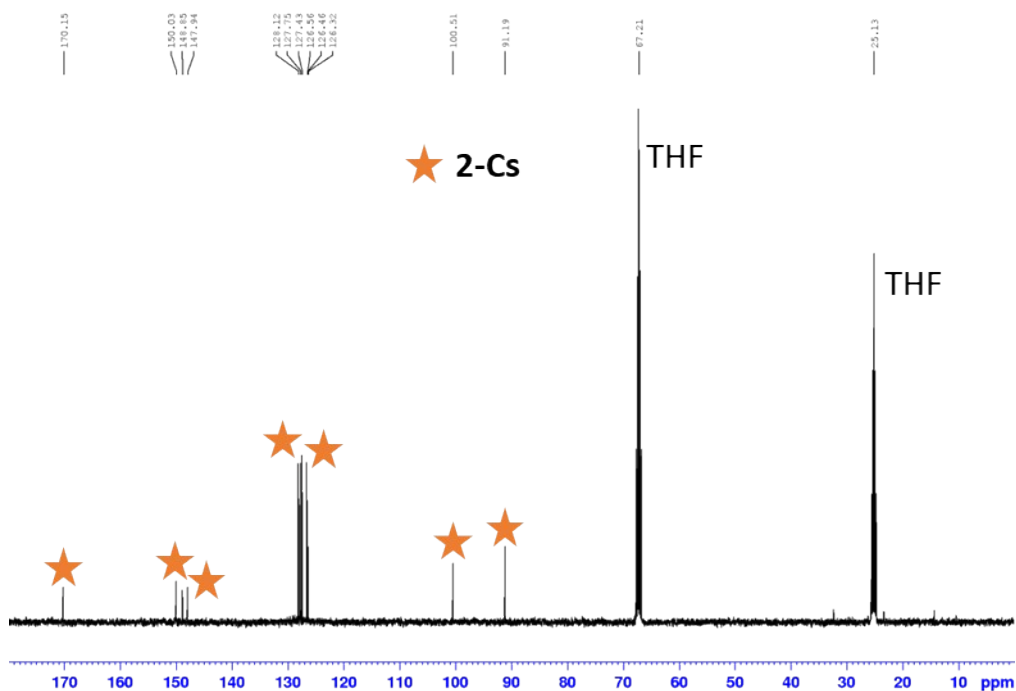

$^{13}\text{C}\{^1\text{H}\}$  NMR (100.6 MHz, THF- $d_8$ , 300 K):  $\delta$  170.2 ( $\text{C}_{\text{quaternary}}$ ,  $-\text{C}=\text{O}$ ), 150.0 ( $\text{C}_{\text{quaternary}}$ ,  $-\text{C}(\text{CH}_2)\text{Ph}$ ), 148.8 ( $\text{C}_{\text{quaternary}}$ , Ph), 147.9 ( $\text{C}_{\text{quaternary}}$ , Ph), 128.1 (CH, Ph), 127.8 (CH, Ph), 127.4 (CH, Ph), 126.6 (CH, Ph), 126.5 (CH, Ph), 126.3 (CH, Ph), 100.5 ( $\text{CH}_2$ ,  $-\text{CH}_2$ ), 91.2 (CH,  $-\text{CH}$ ), 67.2 (THF- $d_8$ ), 25.1 (THF- $d_8$ ) ppm.

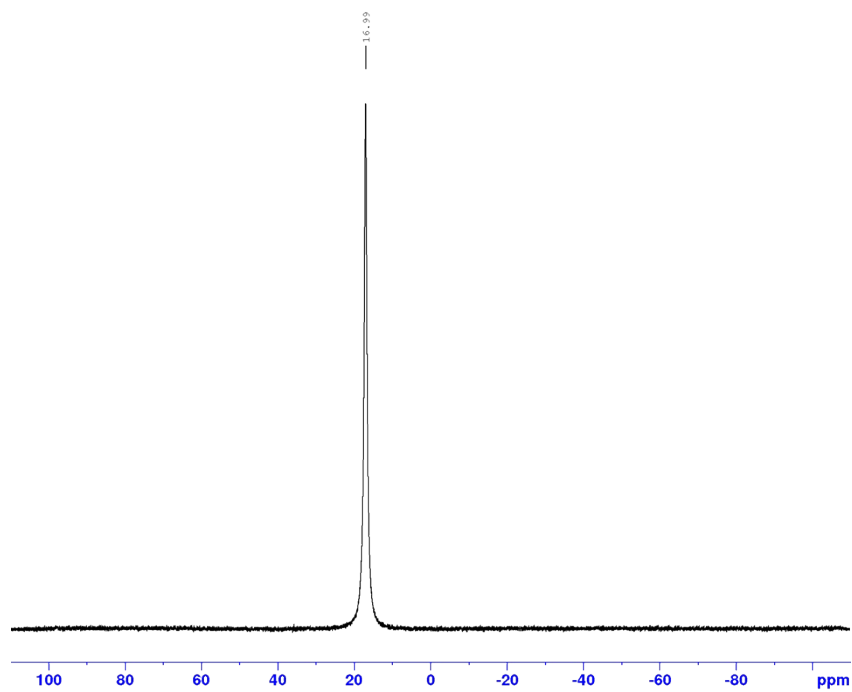

$^{133}\text{Cs}$  NMR (65.6 MHz, THF- $D_8$ , 300 K):  $\delta$  16.99 (2-Cs) ppm.

Figure S4: ORTEP diagram of  $[\text{CsOC}(\text{C}_6\text{H}_5)\text{CHC}(\text{CH}_2)\text{C}_6\text{H}_5\cdot\text{THF}]_n$  (**2-Cs**)

Structure of **2-Cs**, thermal ellipsoids are displayed at 20 % probability level.

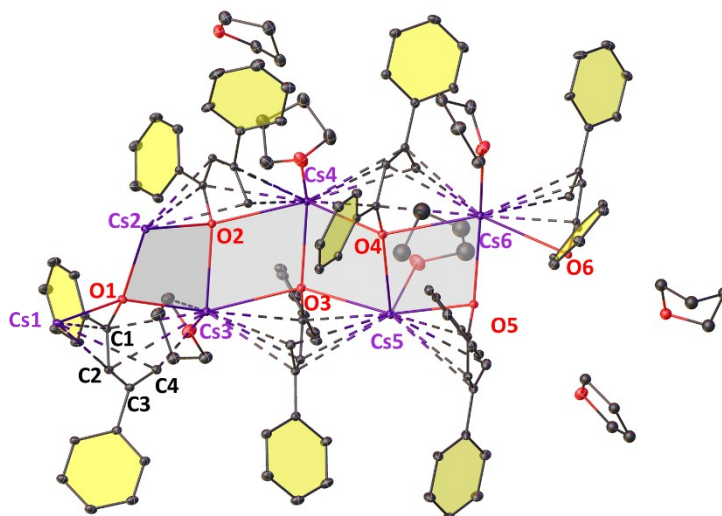

Table S3: Selected bond lengths (Å) and bond angles (°)

| Bonds   | Bond Lengths (Å) |
|---------|------------------|
| Cs1 O13 | 3.153(6)         |
| Cs1 O5  | 3.248(5)         |
| Cs1 O1  | 3.176(4)         |
| Cs1 O6  | 2.854(4)         |
| Cs2 O6  | 3.164(3)         |
| Cs2 O1  | 2.869(4)         |
| Cs1 O1  | 3.176(4)         |
| Cs3 O1  | 3.074(5)         |
| Cs3 O2  | 2.940(4)         |
| Cs2 O2  | 3.111(3)         |
| Cs3 O3  | 3.189(5)         |
| Cs4 O3  | 2.885(4)         |
| Cs4 O2  | 3.187(4)         |
| Cs4 O4  | 3.146(5)         |
| Cs5 O3  | 3.185(5)         |
| Cs5 O4  | 2.894(4)         |
| Cs5 O5  | 3.061(5)         |
| Cs6 O5  | 2.947(4)         |
| Cs6 O4  | 3.314(5)         |
| Cs3 O7  | 3.066(7)         |
| Cs4 O9  | 3.050(7)         |
| Cs4 O2  | 3.187(4)         |
| Cs4 O4  | 3.146(5)         |
| Cs1 O5  | 3.248(5)         |

|              |                        |
|--------------|------------------------|
| Cs1 O6       | 2.854(4)               |
| Cs6 O6       | 3.122(4)               |
| Cs6 O11      | 3.181(5)               |
| Cs5 O10      | 3.089(9)               |
| Cs5 O4       | 2.894(4)               |
| Cs5 O3       | 3.185(5)               |
| <b>Bonds</b> | <b>Bond Angles (°)</b> |
| O5 Cs1 O6    | 71.2(1)                |
| O6 Cs1 O1    | 85.7(1)                |
| O6 Cs1 O13   | 110.5(1)               |
| O5 Cs1 O13   | 112.1(1)               |
| O1 Cs1 O13   | 127.5(1)               |
| O5 Cs1 O1    | 120.3(1)               |
| O1 Cs3 O2    | 80.1(1)                |
| O12 Cs2 O6   | 74.0(5)                |
| O6 Cs2 O2    | 159.5(1)               |
| O2 Cs2 O12   | 118.8(5)               |
| O12 Cs2 O1   | 82.9(5)                |
| O2 Cs3 O7    | 115.9(2)               |
| O7 Cs3 O1    | 106.5(2)               |
| Cs3 O3 Cs4   | 106.8(1)               |
| Cs4 O2 Cs3   | 105.4(1)               |
| O3 Cs3 O2    | 73.5(1)                |
| O2 Cs4 O3    | 74.3(1)                |
| O3 Cs4 O9    | 103.8(2)               |
| O9 Cs4 O2    | 95.2(2)                |
| O3 Cs3 O1    | 148.2(1)               |
| O3 Cs5 O4    | 79.3(1)                |
| Cs4 O3 Cs5   | 97.9(1)                |
| Cs5 O4 Cs4   | 98.5(1)                |
| Cs5 O4 Cs6   | 99.7(1)                |
| Cs6 O5 Cs5   | 104.6(1)               |
| O5 Cs5 O4    | 77.8(1)                |
| O4 Cs6 O5    | 73.2(1)                |
| O5 Cs1 O6    | 71.2(1)                |
| O6 Cs6 O5    | 72.0(1)                |
| Cs6 O5 Cs1   | 105.5(1)               |
| Cs1 O6 Cs6   | 111.2(1)               |
| O11 Cs6 O6   | 100.8(2)               |
| O6 Cs6 O4    | 145.1(1)               |
| O4 Cs6 O11   | 107.6(2)               |
| O11 Cs6 O5   | 144.6(2)               |
| Cs1 O5 Cs5   | 144.5(2)               |

|            |          |
|------------|----------|
| Cs5 O3 Cs3 | 143.6(1) |
| O2 Cs4 O4  | 130.4(1) |
| O9 Cs4 O4  | 132.2(2) |
| O10 Cs5 O4 | 83.2(2)  |
| O10 Cs5 O3 | 82.1(2)  |
| O10 Cs5 O5 | 93.1(2)  |

### Hydrolysis of $[\text{CsOC}(\text{C}_6\text{H}_5)\text{CHC}(\text{CH}_2)\text{C}_6\text{H}_5\cdot\text{THF}]_n$ (2-Cs)

After completion, the reaction mixture of 2-Cs was hydrolysed using a six-fold excess  $\text{H}_2\text{O}$  before being filtered, the resulting solution was dried in vacuo and used to perform NMR and Mass Spectroscopic studies. NMR of final hydrolysed products was performed in  $\text{CDCl}_3$  with adamantane as a standard, while GC-MS was carried out in MeOH. The NIST database was used to identify compounds of interest from the mass spectra.

**$^1\text{H}$  NMR (400.1 MHz,  $\text{CDCl}_3$ , 300 K):**  $\delta$  8.01 (m, 1H, CH, 1,3-diphenylbut-2-en-1-one), 7.98 (m, 3H, CH, acetophenone), 7.56 (m, 3H, CH, acetophenone), 7.47 (m, 3H, CH, acetophenone), 7.41 (m, 2H, CH, 1,3-diphenylbut-2-en-1-one), 7.26 ( $\text{CDCl}_3$ ), 7.17 (m, 1H, CH, 1,3-diphenylbut-2-en-1-one), 2.61 (s, 3H,  $\text{CH}_3$ , acetophenone), 2.60 (d, 1H,  $\text{CH}_3$ , 1,3-diphenylbut-2-en-1-one), 1.88 (adamantane), 1.75 (adamantane), 1.26 (residual hexane), 0.86 (residual hexane), 0.06 (residual HMDS) ppm. Data comparable with literature report of 1,3-diphenylbut-2-en-1-one.<sup>[8]</sup>

**$^{13}\text{C}\{^1\text{H}\}$  NMR (100.6 MHz,  $\text{CDCl}_3$ , 300 K):**  $\delta$  198.2 (C=O, acetophenone), 192.0 (C=O, 1,3-diphenylbut-2-en-1-one), 155.2 ( $\text{C}_{\text{quaternary}}$ , 1,3-diphenylbut-2-en-1-one), 143.0 ( $\text{C}_{\text{quaternary}}$ , 1,3-diphenylbut-2-en-1-one), 139.5 ( $\text{C}_{\text{quaternary}}$ , 1,3-diphenylbut-2-en-1-one), 137.3 ( $\text{C}_{\text{quaternary}}$ , acetophenone), 133.2 (CH, acetophenone), 132.7 (CH, 1,3-diphenylbut-2-en-1-one), 129.3 (CH, 1,3-diphenylbut-2-en-1-one), 128.8 (CH, acetophenone), 128.7 (CH, acetophenone), 128.5 (CH, acetophenone), 128.4 (CH, acetophenone), 126.6 (CH, 1,3-diphenylbut-2-en-1-one), 122.3 (CH, 1,3-diphenylbut-2-en-1-one), 77.2 ( $\text{CDCl}_3$ ), 37.9 (adamantane), 32.1 (unknown), 29.8 ( $\text{CH}_3$ , 1,3-diphenylbut-2-en-1-one), 28.5 (adamantane), 26.7 ( $\text{CH}_3$ , acetophenone), 22.8 (residual hexane), 19.0 (unknown), 14.3 (residual hexane) ppm.

**GC-MS (MeOH):** Acetophenone (rt 7.5 mins, m/z 105), 1,3-diphenylbut-2-en-1-one (rt 12.8 and 13.6 mins, m/z 222).

## Synthesis of $[\text{RbOC}(\text{C}_6\text{H}_5)\text{NCH}_2\text{C}_6\text{H}_5]_n$ (**3-Rb**)

RbHMDS (0.147 g, 0.5 mmol) was dissolved in dried THF (2 ml) before benzaldehyde (51  $\mu\text{l}$ , 0.5 mmol) was added to afford a pale-yellow solution which quickly turned to dark blue and then dark pink upon mixing at room temperature. The reaction was then heated overnight at 70°C. This THF solution layered with hexane gave a heterogeneous mixture of dark pink solid and colourless crystals of **3-Rb** (crude yield, 0.0561 g, 0.190 mmol, 38 %). This mixture was poorly soluble in THF- $\text{D}_8$ .

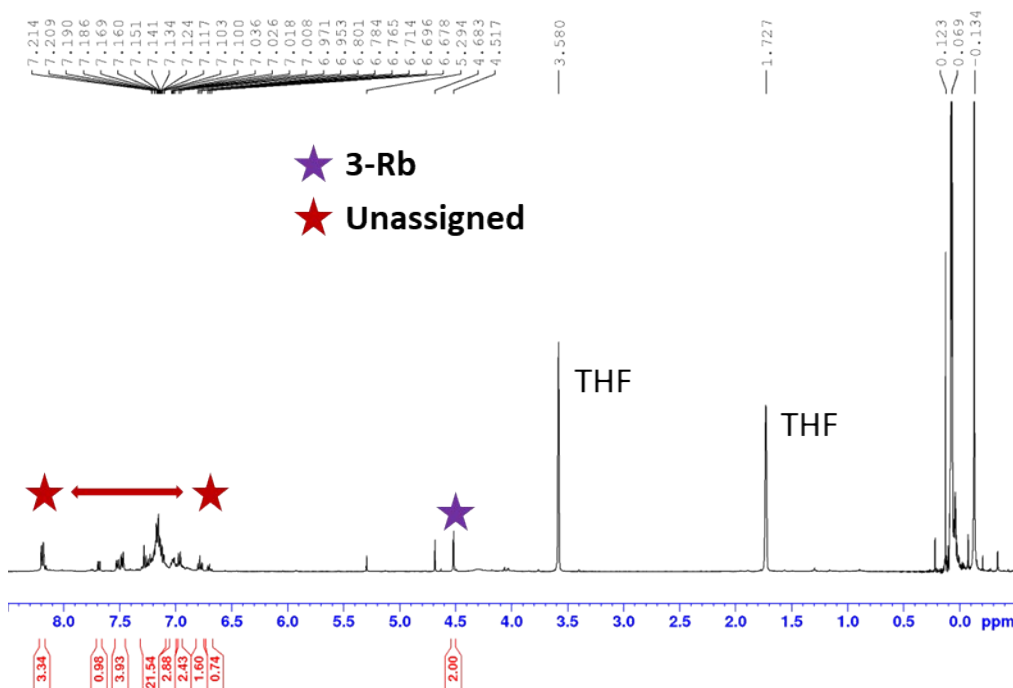

$^1\text{H}$  NMR (400.1 MHz, THF- $\text{D}_8$ , 300 K):  $\delta$  8.19-6.87 (aromatic signals could not be assigned), 5.29 (unknown impurity), 4.68 (unknown impurity), 4.52 (s, 2H,  $\text{CH}_2$ , **3-Rb**), 3.58 (THF- $\text{d}_8$ ), 1.73 (THF- $\text{d}_8$ ) 0.12 (unknown impurity), 0.07 [HMDS(H)], -0.13 (RbHMDS) ppm.

Limited solubility of **3-Rb** resulted in a poor quality  $^{13}\text{C}$  NMR spectrum.

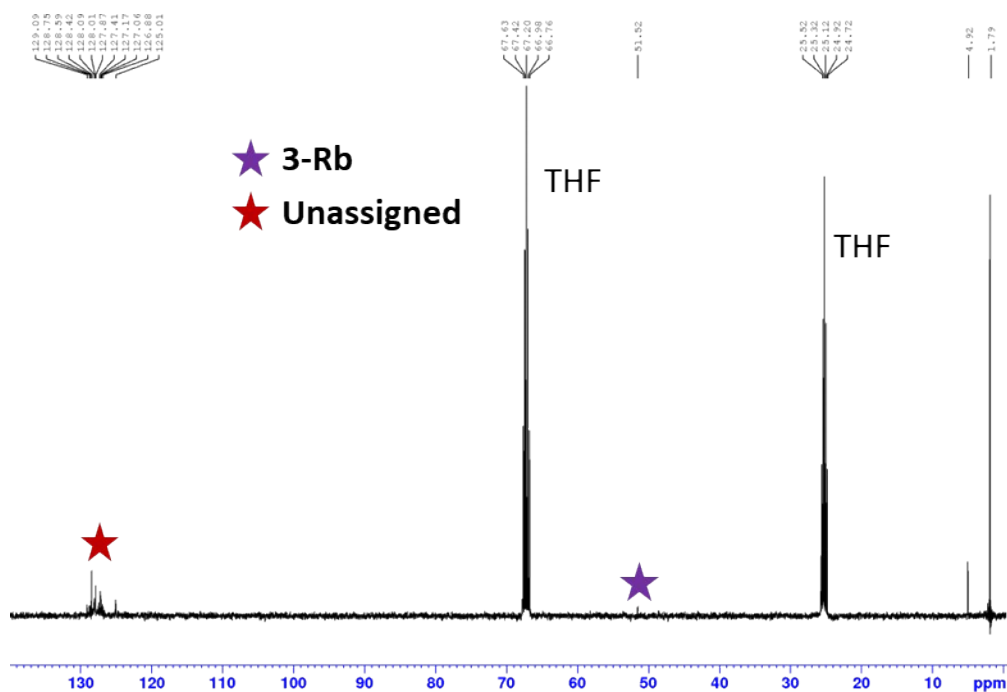

$^{13}\text{C}\{^1\text{H}\}$  NMR (100.6 MHz, THF-d<sub>8</sub>, 300 K):  $\delta$  129.1-125.0 (aromatic signals could not be assigned), 67.2 (THF-d<sub>8</sub>), 51.5 (CH<sub>2</sub>, **3-Rb**), 25.1 (THF-d<sub>8</sub>), 4.92 (RbHMDS), 1.8 [HMDS(H)] ppm.

Figure S5: ORTEP diagram of  $[\text{RbOC}(\text{C}_6\text{H}_5)\text{NCH}_2\text{C}_6\text{H}_5]_n$  (**3-Rb**)

(Top) Structure of **3-Rb**, with thermal ellipsoids displayed at 20 % probability level; (bottom) section of the infinite network structure of  $[\text{RbOC}(\text{Ph})=\text{NCH}_2\text{Ph}]_{\infty}$  (**3-Rb**). Thermal ellipsoids of all non-C/H atoms are displayed at 25% probability, and C atoms reduced to 5% for clarity. H atoms are omitted, and aromatic rings are shaded in yellow, grey, and teal for clear depiction of M--- $\pi$  interactions.  $C_t$  depicts the centroid of Ph rings.

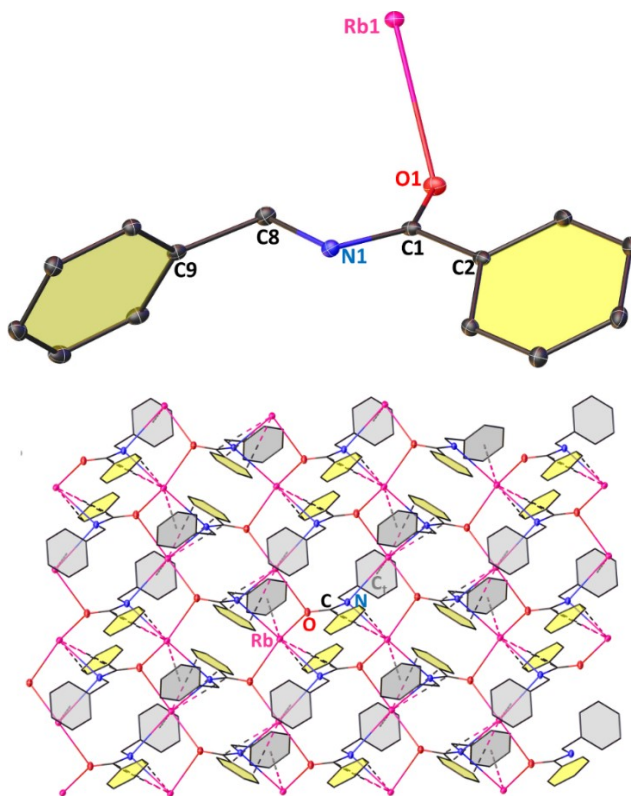

Table S4: Selected bond lengths (Å) and bond angles (°)

| Bonds     | Bond Lengths (Å) |
|-----------|------------------|
| O1 C1     | 1.301(3)         |
| C1 C2     | 1.509(3)         |
| C1 N1     | 1.315(4)         |
| N1 C8     | 1.464(2)         |
| C8 C9     | 1.498(4)         |
| N1 Rb1    | 3.363(2)         |
| N1 Rb1    | 3.029(2)         |
| Rb1 O1    | 2.877(2)         |
| Rb1 O1    | 3.006(2)         |
| Rb1 C9    | 3.296(2)         |
| Rb1 C7    | 3.528(3)         |
| Bonds     | Bond Angles (°)  |
| O1 Rb1 O1 | 152.78(5)        |

|            |           |
|------------|-----------|
| O1 Rb1 N1  | 80.22(5)  |
| O1 Rb1 N1  | 101.69(5) |
| O1 Rb1 N1  | 84.61(5)  |
| O1 Rb1 C9  | 99.52(5)  |
| N1 Rb1 N1  | 156.61(5) |
| N1 Rb1 C9  | 42.94(5)  |
| C9 Rb1 N1  | 159.10(5) |
| Rb1 O1 Rb1 | 100.91(6) |
| O1 Rb1 N1  | 83.98(5)  |
| Rb1 N1 Rb1 | 90.29(5)  |
| Rb1 O1 C1  | 136.2(1)  |
| Rb1 N1 C1  | 105.6(1)  |
| N1 C1 O1   | 126.1(2)  |
| N1 C1 C2   | 115.7(2)  |
| C2 C1 O1   | 118.2(2)  |
| Rb1 N1 C8  | 116.2(1)  |
| Rb1 O1 C1  | 116.5(1)  |
| Rb1 N1 C1  | 132.8(1)  |
| O1 C1 N1   | 126.1(2)  |
| C1 N1 C8   | 112.8(2)  |



## Hydrolysis of [RbOC(C<sub>6</sub>H<sub>5</sub>)NCH<sub>2</sub>C<sub>6</sub>H<sub>5</sub>]<sub>n</sub> (3-Rb)

After completion, the reaction mixture of 3-Rb was hydrolysed using a six-fold excess H<sub>2</sub>O before being filtered, the resulting solution was dried in vacuo and used to perform NMR and Mass Spectroscopic studies. NMR of final hydrolysed products was performed in CDCl<sub>3</sub> with adamantane as a standard, while GC-MS was carried out in MeOH. The NIST database was used to identify compounds of interest from the mass spectra.

**<sup>1</sup>H NMR (400.1 MHz, CDCl<sub>3</sub>, 300 K):** δ 8.23-7.02 (aromatic signals could not be assigned), 7.26 (CDCl<sub>3</sub>), 4.66 (s, 1H, CH<sub>2</sub>, N-benzylbenzamide), 4.63 (s, 1H, CH<sub>2</sub>, N-benzylbenzamide), 1.88 (adamantane), 1.76 (adamantane), 1.26 (residual hexane), 0.86 (residual hexane), 0.15 (residual HMDS) ppm. Comparable with literature report.<sup>[9]</sup>

**<sup>13</sup>C{<sup>1</sup>H} NMR (100.6 MHz, CDCl<sub>3</sub>, 300 K):** δ 131.7-125.9 (aromatic signals could not be assigned), 77.2 (CDCl<sub>3</sub>), 44.2 (CH<sub>2</sub>, N-benzylbenzamide), 37.9 (adamantane), 29.8 (unknown), 28.5 (adamantane), 22.9 (residual hexane), 14.2 (residual hexane), 1.5 (residual HMDS) ppm.

**GC-MS (MeOH):** Benzaldehyde (rt 6.3 mins, m/z 106), N-Benzylbenzamide (rt 13.7 mins, m/z 211).

## Synthesis of $[\text{CsOC}(\text{C}_6\text{H}_5)\text{NCH}_2\text{C}_6\text{H}_5]_n$ (**3-Cs**)

CsHMDS (0.147 g, 0.5 mmol) was dissolved in THF (2 ml) before benzaldehyde (51  $\mu\text{l}$ , 0.5 mmol) was added to give a pale-yellow solution which quickly turned to dark blue and then to a deep purple upon mixing at room temperature. The reaction was then heated overnight at 70  $^\circ\text{C}$ . The THF solution layered with hexane gave a heterogeneous mixture of purple solid and colourless crystals of **3-Cs** (Crude yield, 0.126 g, 0.367 mmol, 73 %). Similarly to **3-Rb**, this mixture showed poor solubility in the NMR solvent.

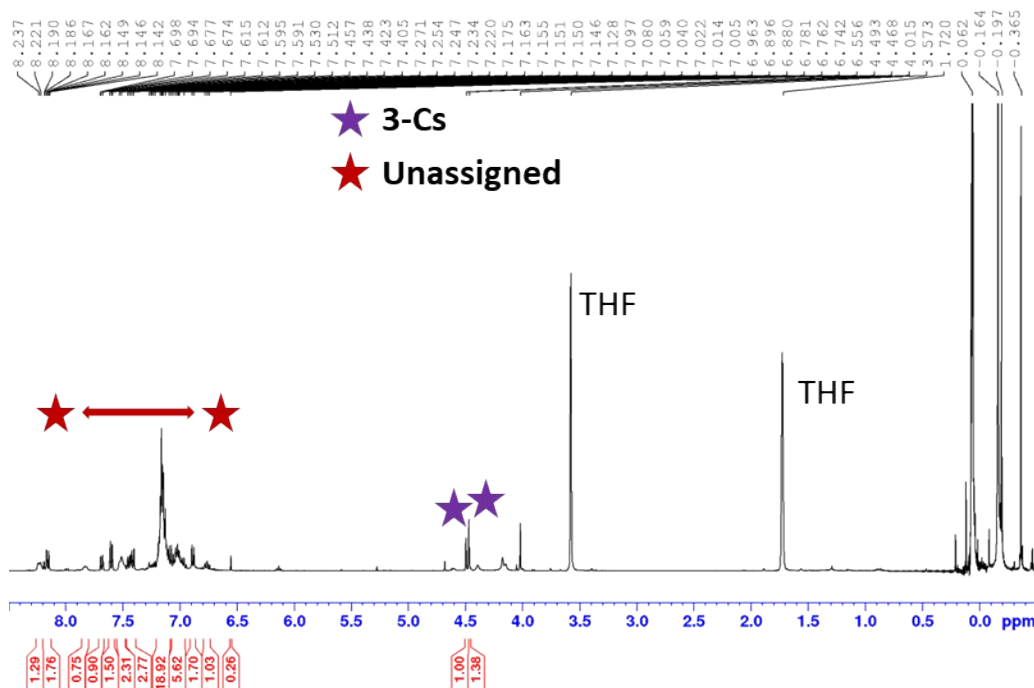

$^1\text{H}$  NMR (400.1 MHz, THF- $d_8$ , 300 K):  $\delta$  8.23-6.56 (aromatic signals could not be assigned), 4.49 (s, 1H,  $\text{CH}_2$ , **3-Cs**), 4.47 (s, 1H,  $\text{CH}_2$ , **3-Cs**), 4.18 (unknown impurity) 4.52 (s, unknown impurity), 3.57 (THF- $d_8$ ), 1.72 (THF- $d_8$ ), 0.07 [HMDS(H)], -0.16 (CsHMDS), -0.20 (unknown impurity), -0.37 (unknown impurity) ppm.

Limited solubility of **3-Cs** results in poor quality  $^{13}\text{C}$  and  $^{133}\text{Cs}$  NMR spectra.

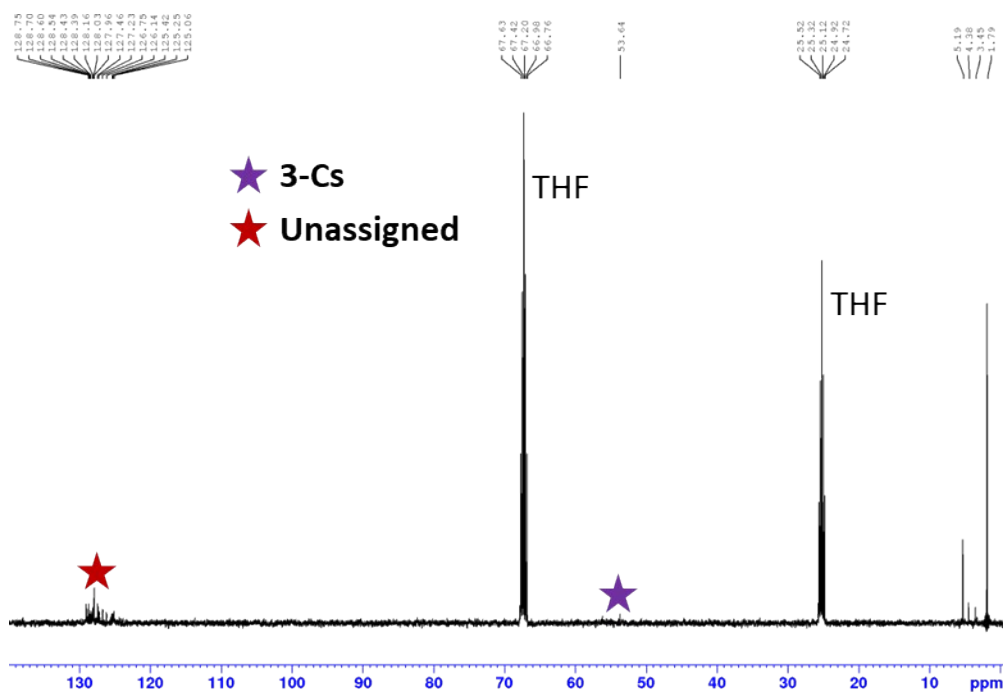

$^{13}\text{C}\{^1\text{H}\}$  NMR (100.6 MHz, THF- $d_8$ , 300 K):  $\delta$  129.1-125.1 (aromatic signals could not be assigned), 67.2 (THF- $d_8$ ), 53.6 ( $\text{CH}_2$ , **3-Cs**), 25.1 (THF- $d_8$ ), 5.19 (CsHMDS), 4.38 (unknown impurities), 3.4 (unknown impurities), 1.8 [HMDS(H)] ppm.

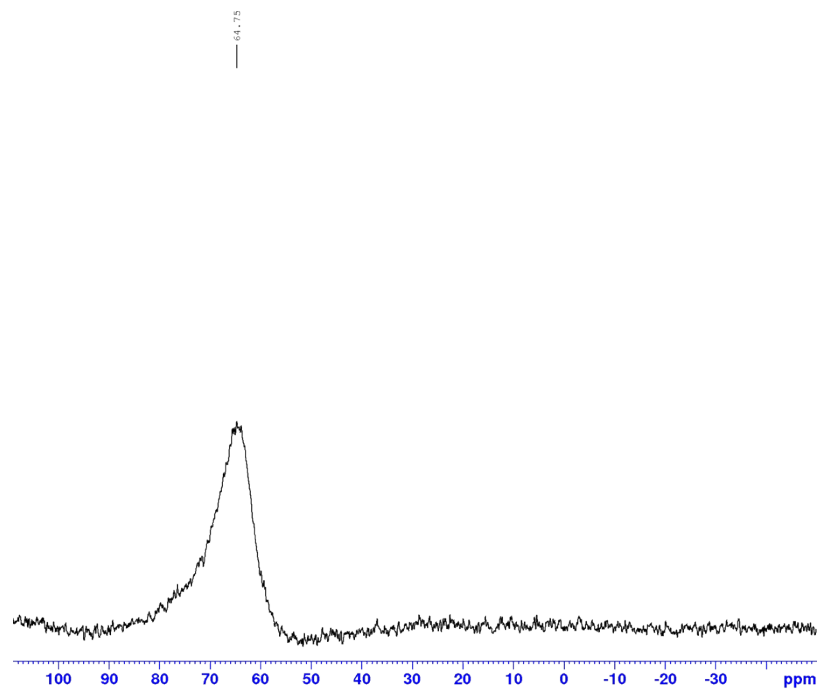

$^{133}\text{Cs}$  NMR (65.6 MHz, THF- $d_8$ , 300 K):  $\delta$  64.75 (3-Cs) ppm.

Figure S6: ORTEP diagram of  $[\text{CsOC}(\text{C}_6\text{H}_5)\text{NCH}_2\text{C}_6\text{H}_5]_n$  (**3-Cs**)

Structure of **3-Cs**, thermal ellipsoids are displayed at 20 % probability level.

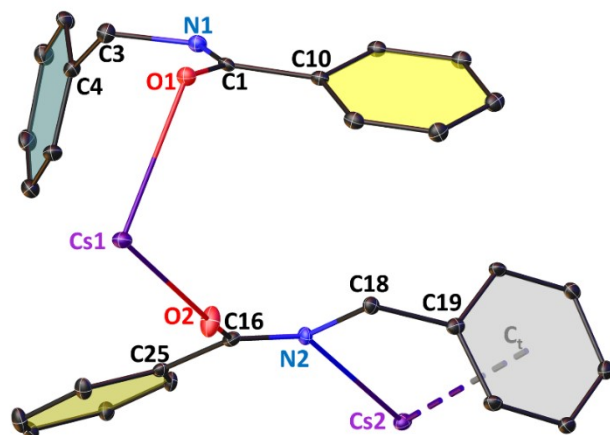

Table S5: Selected bond lengths (Å) and bond angles (°)

| Bonds   | Bond Lengths (Å) |
|---------|------------------|
| Cs2 O1  | 2.770(4)         |
| Cs2 O3  | 2.898(5)         |
| Cs2 C36 | 3.303(7)         |
| Cs2 C33 | 3.164(5)         |
| Cs2 C34 | 3.285(5)         |
| Cs2 C35 | 3.314(5)         |
| Cs2 O4  | 2.983(7)         |
| Cs2 C20 | 3.406(6)         |
| Cs2 C18 | 3.456(6)         |
| Cs2 C17 | 3.170(5)         |
| Cs2 C19 | 3.620(5)         |
| Cs2 O2  | 2.865(3)         |
| Cs3 O2  | 2.797(3)         |
| Cs3 O1  | 2.938(5)         |
| Cs1 O1  | 2.943(5)         |
| Cs1 O3  | 2.685(3)         |
| Cs3 O5  | 2.890(4)         |
| Cs3 C1  | 3.231(6)         |
| Cs1 O1  | 2.943(5)         |
| Cs1 C1  | 3.144(6)         |
| Cs1 C2  | 3.361(6)         |
| Cs1 C3  | 3.473(6)         |
| Cs1 C4  | 3.430(8)         |
| O3 C33  | 1.281(6)         |
| C33 C34 | 1.375(7)         |

|                      |                        |
|----------------------|------------------------|
| C34 C35              | 1.453(7)               |
| C35 C36              | 1.348(7)               |
| O2 C17               | 1.297(6)               |
| C17 C18              | 1.372(7)               |
| C18 C19              | 1.457(7)               |
| C19 C20              | 1.327(7)               |
| O1 C1                | 1.292(6)               |
| C1 C2                | 1.384(7)               |
| C2 C3                | 1.435(8)               |
| C3 C4                | 1.352(8)               |
| Cs2---C <sub>t</sub> | 3.359                  |
| <b>Bonds</b>         | <b>Bond Angles (°)</b> |
| O3 Cs2 O4            | 92.5(2)                |
| O3 Cs2 C33           | 23.9(1)                |
| O3 Cs2 C34           | 44.1(1)                |
| O3 Cs2 C35           | 56.6(1)                |
| O3 Cs2 C36           | 56.3(1)                |
| O3 Cs2 O1            | 83.8(1)                |
| O3 Cs2 O2            | 165.9(1)               |
| O3 Cs2 C17           | 154.4(1)               |
| O3 Cs2 C18           | 144.2(1)               |
| O3 Cs2 C19           | 139.0(1)               |
| O3 Cs2 C20           | 138.6(1)               |
| O3 Cs2 O1            | 83.8(1)                |
| O1 Cs2 O2            | 82.5(1)                |
| O1 Cs2 O4            | 96.0(2)                |
| Cs2 O2 Cs3           | 93.9(1)                |
| O2 Cs 3 O1           | 80.7(1)                |
| Cs 3 O1 Cs2          | 92.9(1)                |
| Cs 2 O3 Cs1          | 95.6(1)                |
| O3 Cs 1 O1           | 84.5(1)                |
| Cs 1 O1 Cs2          | 92.8(1)                |

## Hydrolysis of $[\text{CsOC}(\text{C}_6\text{H}_5)\text{NCH}_2\text{C}_6\text{H}_5]_n$ (**3-Cs**)

After completion, the reaction mixture of 3-Cs was hydrolysed with a six-fold excess  $\text{H}_2\text{O}$  before being filtered, the resulting solution was dried in vacuo and used to perform NMR and Mass Spectroscopic studies. NMR of final hydrolysed products was performed in  $\text{CDCl}_3$  with adamantane as a standard, while GC-MS was carried out in MeOH. The NIST database was used to identify compounds of interest from the mass spectra.

**$^1\text{H}$  NMR (400.1 MHz,  $\text{CDCl}_3$ , 300 K):**  $\delta$  8.00-7.02 (aromatic signals could not be assigned), 7.26 ( $\text{CDCl}_3$ ), 6.39 (s, 1H, -NH, N-benzylbenzamide), 4.66 (s, 1H,  $\text{CH}_2$ , N-benzylbenzamide), 4.62 (s, 1H,  $\text{CH}_2$ , N-benzylbenzamide), 4.57 (unknown), 1.88 (adamantane), 1.76 (adamantane), 1.26 (residual hexane), 0.86 (residual hexane), 0.15 (residual HMDS) ppm. Data for N-benzylbenzamide is comparable with a literature report.<sup>[9]</sup>

**$^{13}\text{C}\{^1\text{H}\}$  NMR (100.6 MHz,  $\text{CDCl}_3$ , 300 K):**  $\delta$  138.3-126.2 (aromatic signals could not be assigned), 77.2 ( $\text{CDCl}_3$ ), 44.3 ( $\text{CH}_2$ , N-benzylbenzamide), 37.9 (adamantane), 29.8 (unknown), 28.5 (adamantane), 22.8 (residual hexane), 14.2 (residual hexane), 1.5 (residual HMDS) ppm.

**GC-MS (MeOH):** Benzaldehyde (rt 6.3 mins, m/z 106), N-Benzylbenzamide (rt 13.7 mins, m/z 211).

Table S6: Selected X-ray crystal structural data and refinement details for compounds 1-3

| Compound                                 | 1-Cs                                                                | 2-Rb                                                                                                       | 2-Cs                                                                                                       | 3-Rb                                                                                               | 3-Cs                                                                                               |
|------------------------------------------|---------------------------------------------------------------------|------------------------------------------------------------------------------------------------------------|------------------------------------------------------------------------------------------------------------|----------------------------------------------------------------------------------------------------|----------------------------------------------------------------------------------------------------|
|                                          | [CsOC(CH <sub>2</sub> )C <sub>6</sub> H <sub>5</sub> ] <sub>n</sub> | [RbOC(C <sub>6</sub> H <sub>5</sub> )CHC(CH <sub>2</sub> )C <sub>6</sub> H <sub>5</sub> .THF] <sub>n</sub> | [CsOC(C <sub>6</sub> H <sub>5</sub> )CHC(CH <sub>2</sub> )C <sub>6</sub> H <sub>5</sub> .THF] <sub>n</sub> | [RbOC(C <sub>6</sub> H <sub>5</sub> )NCH <sub>2</sub> C <sub>6</sub> H <sub>5</sub> ] <sub>n</sub> | [CsOC(C <sub>6</sub> H <sub>5</sub> )NCH <sub>2</sub> C <sub>6</sub> H <sub>5</sub> ] <sub>n</sub> |
| CCDC                                     | 2293054                                                             | 2293057                                                                                                    | 2293058                                                                                                    | 2293055                                                                                            | 2293056                                                                                            |
| Instrument                               | Rigaku                                                              | Rigaku                                                                                                     | Rigaku                                                                                                     | Rigaku                                                                                             | Rigaku                                                                                             |
| Empirical Formula                        | C <sub>8</sub> H <sub>7</sub> CsO                                   | C <sub>57</sub> H <sub>57</sub> Rb <sub>3</sub> O <sub>5.25</sub>                                          | C <sub>20.76</sub> H <sub>22.51</sub> CsO <sub>2.19</sub>                                                  | C <sub>14</sub> H <sub>12</sub> RbNO                                                               | C <sub>14</sub> H <sub>12</sub> CsNO                                                               |
| Molecular Mass                           | 252.05                                                              | 1082.43                                                                                                    | 439.89                                                                                                     | 295.72                                                                                             | 343.16                                                                                             |
| X-ray wavelength Å                       | Cu Kα (λ 1.54184)                                                   | Cu Kα (λ 1.54184)                                                                                          | Cu Kα (λ 1.54184)                                                                                          | Cu Kα (λ 1.54184)                                                                                  | Cu Kα (λ 1.54184)                                                                                  |
| Space Group                              | P b c a                                                             | C 1 2/c 1                                                                                                  | P -1                                                                                                       | P 1 21/c 1                                                                                         | P c a 21                                                                                           |
| Crystal system                           | orthorhombic                                                        | monoclinic                                                                                                 | triclinic                                                                                                  | monoclinic                                                                                         | orthorhombic                                                                                       |
| Temperature (K)                          | 100(2)                                                              | 200(2)                                                                                                     | 159.99(10)                                                                                                 | 220.00(10)                                                                                         | 220(2)                                                                                             |
| a/Å                                      | 6.77660(10)                                                         | 25.4358(3)                                                                                                 | 13.3301(2)                                                                                                 | 12.69990(10)                                                                                       | 18.6607(4)                                                                                         |
| b/Å                                      | 8.3061(2)                                                           | 15.8158(2)                                                                                                 | 16.6470(2)                                                                                                 | 8.71240(10)                                                                                        | 6.0929(2)                                                                                          |
| c/Å                                      | 29.6225(6)                                                          | 26.6220(3)                                                                                                 | 28.3794(2)                                                                                                 | 12.20280(10)                                                                                       | 22.6838(7)                                                                                         |
| α/°                                      | 90                                                                  | 90                                                                                                         | 73.5210(10)                                                                                                | 90                                                                                                 | 90                                                                                                 |
| β/°                                      | 90                                                                  | 92.4240(10)                                                                                                | 83.5790(10)                                                                                                | 113.8780(10)                                                                                       | 90                                                                                                 |
| γ/°                                      | 90                                                                  | 90                                                                                                         | 80.0460(10)                                                                                                | 90                                                                                                 | 90                                                                                                 |
| Volume/Å <sup>3</sup>                    | 1667.37(6)                                                          | 10700.1(2)                                                                                                 | 5934.82(13)                                                                                                | 1234.63(2)                                                                                         | 2579.10(13)                                                                                        |
| Z                                        | 8                                                                   | 8                                                                                                          | 12                                                                                                         | 4                                                                                                  | 8                                                                                                  |
| 2θmax °                                  | 146.4                                                               | 146.4                                                                                                      | 147.8                                                                                                      | 146.1                                                                                              | 148.9                                                                                              |
| Measured Reflections                     | 6552                                                                | 35064                                                                                                      | 111321                                                                                                     | 25780                                                                                              | 37960                                                                                              |
| Unique Reflections                       | 1667                                                                | 10480                                                                                                      | 23704                                                                                                      | 2459                                                                                               | 5087                                                                                               |
| R <sub>int</sub>                         | 0.0833                                                              | 0.0388                                                                                                     | 0.0498                                                                                                     | 0.0224                                                                                             | 0.0494                                                                                             |
| Observed Reflections [I>2σI]             | 1354                                                                | 6670                                                                                                       | 19131                                                                                                      | 2378                                                                                               | 4496                                                                                               |
| No. parameters                           | 99                                                                  | 653                                                                                                        | 1391                                                                                                       | 162                                                                                                | 308                                                                                                |
| Goodness of Fit                          | 1.057                                                               | 1.076                                                                                                      | 1.083                                                                                                      | 1.075                                                                                              | 1.194                                                                                              |
| R [on F, obs refs only]                  | 0.0495                                                              | 0.0482                                                                                                     | 0.0507                                                                                                     | 0.0243                                                                                             | 0.0389                                                                                             |
| ωR [on F <sup>2</sup> , all data]        | 0.1378                                                              | 0.1802                                                                                                     | 0.1511                                                                                                     | 0.0640                                                                                             | 0.1147                                                                                             |
| Largest diff. peak /hole/Å <sup>-3</sup> | 1.58/-1.21                                                          | 0.89/-0.79                                                                                                 | 1.02/-1.57                                                                                                 | 0.44/-0.38                                                                                         | 0.93/-0.89                                                                                         |



## References

1. D. Shriver, M. Drezdson, 'The Manipulation of Air-Sensitive Compounds', John Wiley & Sons Ltd., 1986.
2. A. I. Ojeda-Amador, A. J. Martínez-Martínez, A. R. Kennedy, C. T. O'Hara, *Inorg. Chem.* 2016, **55**, **11**, 5719–5728.
3. S. Krieck, P. Schüler, H. Görls, M. Westerhausen, *Dalton Trans.*, 2018, **47**, 12562–12569.
4. *CrysalisPro*. (Rigaku Oxford Diffraction, 2019).
5. G. M. Sheldrick, 'SHELXT - Integrated space-group and crystal-structure determination', *Acta Crystallogr. Sect. C Struct. Chem.* 2015, **71**, 3–8.
6. L. J. Farrugia, 'WinGX and ORTEP for Windows: an update', *J. Appl. Crystallogr.* 2012, **45**, 849–854.
7. O. V. Dolomanov, L. J. Bourhis, R. J. Gildea, J. A. K. Howard and H. Puschmann, *J. Appl. Crystallogr.* 2009, **42**, 339–341.
8. Q. Jiang, J. Jia, B. Xu, A. Zhao, C. Guo, *J. Org. Chem.*, 2015, **80**, 3586–3596.
9. Q. Teng, G. Sun, F. Huang, K. Wang, F. Liang, *Adv. Synth. Catal.*, 2023, **365**, 307–311.
10. a) S. Neander, U. Behrens and F. Olbrich, *J. Organomet. Chem.*, 2000, **604**, 59–67; b) P. Schüler, H. Görls, M. Westerhausen and S. Krieck, *Dalton Trans.*, 2019, **48**, 8966–8975; c) S. Krieck, P. Schüler, H. Görls, M. Westerhausen, *Dalton Trans.*, 2018, **47**, 12562–12569; d) R. Neufeld, R. Michel, R. Herbst-Irmer, R. Schöne and D. Stalke, *Chem. Eur. J.*, 2016, **22**, 12340–12346.
